# Supplementary material for: What Does “Asymmetric VR” Mean? A Directed Content Analysis of Co-Located Use of VR by Users on Reddit
Source: Frontiers journal article supplement (doi:10.3389/frvir.2021.765881), 2021-12-10
Supplement: Table_2.XLSX [file Table_2.XLSX]

## Sheet: Pattern_categories
Name	T_SCP_TI_IR_BoP	description	Game example	Other info
online	0_0_0_0_1	remote teleguidance using VR to access a single desktop	Bigscreen	symmetric, remote
online	NA_0_0_0_1	troubleshooting / remote teleguidance using VR to see eachothers' desktops	Bigscreen	symmetric, remote
online	NA_0_NA_0_NA	Couch co-op (2D) using VR to simulate "couch"	Bigscreen	symmetric, remote
online	NA_0_NA_NA_NA	Co-op, not clear if asymmetric or not, but seems to be "VR multiplayer" & therefore symmetric	Raw Data, Rec Room	symmetric
online	NA_1_1_1_1	designing the game so that a role works in either VR or non-VR will compromise design, balance, player comfort, or all three	VR-agnostic designs	symmetric
online	0_0_NA_0_NA	"multiplayer mobile VR" and an ask to be symmetric	Hell Eluja (an ask)	symmetric, co-located
pass-and-play	0_0_0_NA_0	pass-and-play, "goes over well as a pass-and-play"	VR Invaders, Dick Wilde, London Heist, Space Pirate Trainer	symmetric, co-located
pass-and-play	0_0_0_NA_NA	local highscore pass-and-play	BLARP!	asymmetric, co-located
pass-and-play	0_1_0_0_0	turn-based usage; allow competitive / teams of two with one in VR at-a-time, others watch	VR Sport	asymmetric, co-located
pass-and-play	0_NA_0_0_0	Pass-and-play that is massively accessible, pass-and-play local leaderboards & short/sweet	Headmaster, Lethal	symmetric, co-located
pass-and-play	0_NA_0_0_NA	VR party game using carnival style games and a score board	VR Furballs - Demolition	asymmetric, co-located
pass-and-play	0_NA_0_NA_0	party game with online leaderboard	Heist	symmetric, co-located
pass-and-play	0_NA_0_0_1	skill difference in party games	Headmaster	symmetric, co-located
pass-and-play	0_NA_0_NA_NA	demo mode for gatherings, short games with score boards, games for a VR Night	In Death, Space Pirate Trainer, Dick Wilde, (Brookhaven), (Headmaster), EVE, Lucky's Tale	symmetric, co-located
pass-and-play	0_NA_NA_0_NA	demo or party game for getting others interested	Audiosheild	symmetric, co-located
pass-and-play	0_NA_NA_1_NA	look-how-cool-VR-is game, turn-taking, one person at-a-time, simple for anyone, learn VR demo	Waltz of the Wizard, Fruit Ninja, First Contact, Batman, Ocean Rift	symmetric, co-located
pass-and-play	0_NA_NA_NA_NA	nooby look-how-cool-VR is games	Fruit Ninja, Pixel Gear	symmetric, co-located
pass-and-play	NA_0_0_0_0	Fun to spectate; high score competition;	Pistol Whip	symmetric co-located
pass-and-play	NA_NA_0_NA_NA	sort of a party game; short session adrenaline gamergasm, high score to compete, nothing to learn; excellent for team problem solving (not clear why or how)	VRChat, Shattered Lights, Beat Saber, Super Hot VR, Sairento VR, Fruit Ninja, Statik	symmetric, co-located
showcase	1_0_NA_0_NA	spectator mode; curbing "sitting around watching at VR demos"		asymmetric, co-located
showcase	1_0_NA_0_0	focus is on the VR; playing with non-VR friends, symmetrical roles, interfaces; 2D/VR Crossover games; VR ports of flat games	Payday 2 VR	asymmetric, remote
showcase	1_NA_0_NA_NA	a mini-con using asymmetry to keep the line waiting to use VR occupied; "more of a showcase than a game"; only one headset needed and both players get to play in VR; clear that another screen is in use, and that there is symmetry in the goals of the players	Richie's Plank Experience, Statik	asymmetric, co-located
showcase	1_NA_NA_NA_1	works very well, even with less-experienced players; pass-and-play 4 player; fun for a few minutes of messing around	Panoptic, Diner Duo, Dick Wilde, Carly and the Reaperman, Gorn	asymmetric, co-located
showcase	0_NA_NA_0_NA	demo or party game for getting others interested	Audiosheild	symmetric, co-located
showcase	1_0_NA_NA_NA	"didn't seem like there were any advantages to sealing yourself off in VR;" "could work just as well casually with a tablet;" 3rd person view, with action at the periphery; diarama-style games; control of a lesser-character in VR using m+kb; games where VR and normal players compete or work together; sharing with people in the room, getting them playing via actions with a screen; wife or friend c…	Gorn, Term1nal, Augmented Empire, Waltz of the Wizard, "Asymmetric Content"	asymmetric, co-located
showcase	1_NA_NA_0_NA	mesmerizing to spectate while someone else plays; both pancake and VR	Elite Dangerous	asymmetric
asymmetric VR	1_NA_NA_NA_NA	asymmetric VR games, one in VR and one not; more than one player can play on the same system; VR/flat crossplay for VR/flat LAN party; games that allow spectators to play/interact; party modes, asymmetrical play, or are just good for passing around; have asymmetrical multiplayer or are fun to spectate/take turns on	Panoptic Demo, Diner Duo, Late for Work, Carly and the Reaperman, Puppet Fever, Nemesis Perspective/Realm, Gorn, ViewR, Mass Exodus, Payday 2, The Forest, Minecraft/Vivecraft, Serious Sam, KTANE, Takelings House Party, Fast and Low, Gorn, Blade & Sorcery, Containment Initiative, PartyLine VR, Reiko's Fragments, Ruckus Ridge, Nova Swarm, HangoVR, I can gun, The Persistence, Davigo, Pixel Gear, Dic…	asymmetric
asymmetric VR	1_NA_NA_1_NA	smartphone controllers for asym VR; similar to Jackbox; games that have everyone playing instead of sitting, watching, waiting; larger numbers (optional); different viewpoints for VR and PC; different viewpoints/visuals; monitor as a secondary screen; online/lan multiplayer to allow others to connect without taking hardware resources from VR player; frees up screen real estate for player 2 and ma…	PartyLine VR, KTANE, Face Your Fears, Raptor Valley, CrossViRe, (idea) Nintendoland port, Black Hat Cooperative, Gorn, Carly and the Reaperman	asymmetric, co-located
asymmetric VR	1_NA_0_1_NA	Phone-based interaction for the roles that are not VR	Statik	asymmetric, co-located
asymmetric VR	1_NA_1_0_0	VR charades: one person acts out what they see in VR, outside persons guess	Puppet Fever	asymmetric, co-located
spectating	1_NA_1_0_1	one player uses VR, the others watch and participate outside of the shared space; FPS shooters are fun for the VR player, but not fun enough to watch,	(idea) Tilt Brush Pictionary, DoodleVR, RoboRecall	asymmetric, co-located
spectating	1_1_NA_NA_NA	KTANE by mail (async, asym VR); combination of VR and AR that allows AR players to understand the volume of the world and the ongoing action	concept	asymmetric, co-located
spectating	1_NA_NA_0_1	adding another camera in the world is easier than creating another world for the monitor	concept	asymmetric, co-located
spectating	1_NA_1_1_NA	simple concept, fun or interesting to watch, probably not long-lasting enjoyment	Climbey, Ctrl+Shift, Fruit Ninja	asymmetric, co-located
spectating	1_1_0_1_NA	"scare all your friends with the scariest scenes" - i.e., just show people at a later date and enjoy their reactions at that time	A Chair in a Room: Greenwater	asymmetric, co-located
spectating	NA_0_0_NA_NA	fun to spectate and take turns	Holopoint, Accounting(+), Boneworks	symmetric, co-located
spectating	1_1_NA_1_1	great fun to watch people crawl on the floor and climb around laser tripwires; using AR to watch, opportunity to interact is unclear	Unseen Diplomacy; concept	asymmetric, co-located
spectating	1_1_1_NA_1	Watching someone else enjoy VR;	"a good golf simulator"	asymmetric, co-located
spectating	1_1_NA_NA_1	god-view + gameplay; fantastic for reactions	Panoptic, Rush of Blood	asymmetric, co-located
spectating	1_0_1_1_1	social screen off to avoid spoiling the game while everyone watches the reactions; external players interact with VR player without VR player knowing	The Kitchen Demo	asymmetric, co-located
spectating	1_1_NA_1_NA	high flow, forgetting the outside world potentially to the detriment of external others; intentional pursuit of asymmetry (I like my audio, I don't care if I can't hear or see anyone); allowing external others to see into VR, but not interact with the VR player, directly	Gorn, SideloadVR, (VR Mech suit - Screen FPS shooter), (VR will be primarily played "solo"),	asymmetric, co-located
spectating	1_NA_0_NA_1	watching someone's first VR experience; taking turns; watching someone play a scary game with jump scares	Resident Evil 7	asymmetric, co-located
hide & seek	1_0_NA_NA_1	group vs giant; asymmetrical agent with powers that seem different than the other character; flying ships vs a giant; allow a lot of people to interact with VR	Late For Work, VR Giant	asymmetric
hide & seek	1_1_1_NA_1	VR player is a giant who has to spot a tiny PC player robot trying to escape so they can drop them in a grinder (and win); VR must find PC, going through a series of inticate steps;	Mass Exodus, Late for Work, Panoptic, Rush of Blood, (idea) Plants vs Zombies VR,	asymmetric, co-located
hide & seek	1_1_1_NA_NA	observe environment to find pc players; different and interesting views/jobs to showcase uniqueness of VR;	panoptic, mass exodus	asymmetric, co-located
hide & seek	1_0_1_1_1	VR hunts the PC player, different mechanics for each working for and against them, different win conditions; VR player chases screen player with different physics rules; VR user hides from PC players, who are large creatures (esp. as VR continues shrinking);	Escape from Mandrillia; Heidenspaß; Lone Malice	asymmetric, co-located
hide & seek	1_1_1_1_NA	spectators protect the physical world; VR player has to distinguish the physical from the virtual world (find the non-VR player in a wave of AI); VR as a group separator	Gorn, Mass Exodus, (group vs 2 player play)	asymmetric, co-located
game mastering	1_NA_NA_0_NA	clearly VR and another tech, and the information is the same for all involved	Elite Dangerous, Dirt 2.0 VR; Eleven	asymmetric
game mastering	1_1_NA_0_NA	bringing other players into the game more than watching on a monitor, watching in 3D; if all players could see what you are doing, it would be way too easy; allowing more ppl to interact with the virtual world without increasing required VR HMDs	concept, KTANE	asymmetric, co-located
game mastering	1_1_NA_1_1	seeing the graphics in 2D makes them seem so dated, it's a whole different thing with the headset on; survivalist in VR and spawner on monitor to increase emotional investment & attachment for VR & detachment for PC; monitor = mission control, VR = investigator; inverse of Wii U minigame where game pad sneaks up on screen players to scare them	Ruckus Ridge	asymmetric, co-located
game mastering	1_1_1_NA_1	VR is a giant Gorilla and PC players are tanks and airplanes trying to take VR down, VR Gorilla must protect NPCs from PCs; PC player in a house defending themselves from VR player's spawned zombies, unclear if the VR player can see the PC player; Watching someone else enjoy VR; PC player has to survive VR controlled zombies, find an objective, and escape;	Mass Exodus, Late for Work, Panoptic, Rush of Blood, (idea) Plants vs Zombies VR,	asymmetric, co-located
game mastering	1_1_1_1_1	PC spawns zombies while VR player defends against them; PC runs map controls, VR as a shooter; top-down PC view of map being built, which VR fights their way through; PC as a design environment, VR as an experience environment; PC snaps enviornments together and drags/drops monsters for VR player to play through (like Vanishing Realms); most fun if there will be a way for defender to vary tactics…	(idea) Plants vs Zombies VR, KTANE, Black Hat Cooperative, Escape from Mandrillia, Helleluja, Pac-Man VS VR, DCS, Ruckus Ridge;	asymmetric, co-located
game mastering	1_NA_1_1_1	Screen player defends themselves from VR player's minions	(idea) Plants vs Zombies VR	asymmetric, co-located
boss vs horde	1_NA_1_NA_1	VR player has to stop the other players from accomplishing their goals, getting almost everyone involved, rather than 1-2 players at a time; one player has a secret ulterior motive, the others must stop them; VR player spawns zombies that the other player must defend themselves against; one player fends off enemies, the other keeps the team on track to reach their objective; VR player's reactions…	Crazy Farm, Asteroids and Aliens, Cat n Mouses, Rush of Blood	asymmetric, co-located
boss vs horde	1_0_0_NA_1	3rd person horde vs 1st person giant	VR Giant	asymmetric
boss vs horde	1_1_0_NA_1	many vs. 1, allowing rotation of VR player; Giant VR vs many controller players	Ruckus Ridge VR Party, Late For Work	asymmetric, co-located
boss vs horde	NA_NA_1_1_1	some disparity between the teams/players built into the game/mode, e.g., one side is defense and the other attacks, one super player vs multiple weaker players each with different tools available	definition	asymmetric
boss vs horde	1_NA_1_NA_NA	one player in VR, the other must fight them, one player abuses powers to win while the other must out-maneuver them; up to 8 couch players terrorize VR player, who tries to exterminate the little creatures; easy to jump into, great watching kids/parents hunt each other down; 4 on controllers vs VR player, switch when one controller player wins; VR headsets and phones against each other; show the …	Nemesis Realms, Takelines,	asymmetric
boss vs horde	1_0_0_1_1	one player in VR, the others are trying to get something from them;	Acron	asymmetric, co-located
dueling	1_NA_0_NA_1	a duel between PC and VR	Priest vs Poltergeist	asymmetric, co-located
dueling	1_0_0_0_1	one player can grab the other, but the other player can protect themselves; a group of weaklings vs a single "boss" or giant.	Priest vs Poltergiest	asymmetric, co-located
co-op eye-spy	1_1_0_1_1	external player helps VR player by controlling a light source; external players have access to a manual of information important to the internal player; VR player guides PC players to rescue them; VR sneaking around, PC guiding them; VR has a schematic of the level, which they can use to aid the PC player; cooperative-navigation-by-shouting-at-each-other survival horror; VR Space Ship - Screen mi…	concept, (idea) FNAF VR, KTANE, Footheadcurtain Saga, (idea) VR Space ship - Screen Mission Control, (idea) VR Spy - Screen Spy Tech, Vive Nights at Freddy's, The Companion	asymmetric, co-located
co-op eye-spy	1_1_NA_0_1	help the VR player by calling out when something aproaches from behind; spectating in AR; one is controlling the environment while the other experiences it	concept	asymmetric, co-located
co-op eye-spy	1_1_0_NA_NA	something that the kids can play together, stop complaining about who gets to be in VR vs sitting around and waiting	Fast and Low	asymmetric, co-located
co-op eye-spy	1_1_0_0_1	guests can see what VR player sees and helps them escape; party works together taking turns when they die to beat each room; have the other guests tell VR player what to do; rotate through players	escape rooms	asymmetric, co-located
co-op eye-spy	1_NA_NA_1_1	allowing a user on their phone to interact with a person in VR, could be a completely different interface;	concept	asymmetric, co-located
co-op eye-spy	1_1_0_0_NA	ten-year-olds playing platformers together applicable to VR games, giving a screen view that isn't tied to the VR player; allowing external engagement & understanding of the whole space (like in a platformer)	Lucky's Tale (suggestions for improvement)	asymmetric, co-located
co-op eye-spy	1_NA_0_NA_1	watching, enjoying the story, helping with puzzles;	Resident Evil 7, Rush of Blood,	asymmetric, co-located
co-op eye-spy	1_1_1_0_1	external player guides VR through increasingly complex puzzles; tour guide the person in VR through the environment	KTANE; Aerofly FS2 (helicopter ride)	asymmetric
tele-guidance	1_0_NA_1_NA	Make sure those playing can't see the virtual space; using another modality to interact with the people in VR, party games; experiences that engage the whole group, taking advantage of one person in VR and the others "outside"; clear distinction between inside and outside VR		asymmetric, co-located
tele-guidance	1_0_1_1_1	Only the VR person sees the virtual world, externals try to explain what to do; external player trying to explain how to get back into the game from outside of the headset;	KTANE; troubleshooting	asymmetric, co-located
tele-guidance	1_NA_1_1_1	VR player inadvertently damages the outside world; screen player assists VR player with information;	Beat Saber, Gorn, KTANE	asymmetric, co-located
nav & pilot	1_0_1_NA_1	multiple moments where you have to work together to finish a level; VR Pilot - Screen Co-pilot/Gunner	Carly and the Reaperman; (idea) VR Pilot - Screen Co-pilot/Gunner	asymmetric, co-located
nav & pilot	1_NA_1_1_1	VR avoids being caught while screen player guides them through the level; VR sneaking around, PC has the map + hacking abilities; interdependence is high, meaning the experience doesn't work without both roles;	Black Hat Cooperative, Carly and the Reaperman	asymmetric, co-located
nav & pilot	1_NA_0_1_1	VR is FPS, monitor has overhead view and controls aerial intelligence and artillery / bombing; one player on screen, the other in VR helping them; two people focusing on helping each other out; balance and EOU changes due to proper affordances	(idea) Enemy Territory, Carly and the Reaperman	asymmetric
nav & pilot	1_0_NA_1_1	external players as drone support using external device; spectating a 2D game	DOTA VR client, concept	asymmetric
nav & pilot	1_0_1_0_1	3D platformer where the VR player is bigger and helps the PC player; VR as a giant guarding something from the external players	concept; Acron	asymmetric, co-located
nav & pilot	1_0_1_1_NA	co-existing, spouse won't complain because they need to send an email; showing a different UI on the screen, you control baddies while VR navs a dungeon; asym, remote; analytics to understand balance	Panoptic, Carly and the reaperman, concept	asymmetric
nav & pilot	1_0_1_1_1	pancake perspective is custom & different than VR; PC player can help the VR player; voice communication is recommended, but can be made up for; can be used for more than 2, even though the focus is on 2 players;	Carly and the Reaperman; (idea) VR Plants vs Zombies	asymmetric, co-located
NA/ Delete	NA_NA_NA_NA_NA	generic calls for "multiplayer", description of "asymmetrical", naming games without giving other context, not sure what "co-operative" means in context, asking because "will be having a VR party",		Meant to be "IDK"
NA/ Delete	NA_NA_NA_0_NA	great for quick demos and have staying power	Eleven Table Tennis VR, Space Pirate Trainer, Tilt Bursh, Waltz of the Wizard, Rec Room, Budget Cuts Demo, Accounting, Pavlov	asymmetric, co-located
NA/ Delete	NA_NA_NA_1_NA	"the best… really fun"	Beat Saber, KTANE	unclear
